# Supplementary material for: Flagellin-fused protein targeting M2e and HA2 induces potent humoral and T-cell responses and protects mice against various influenza viruses a subtypes
Source: PubMed Central journal article supplement (PMC5891888; doi:10.1186/s12929-018-0433-5), 2018-04-09
Supplement: 12929_2018_433_MOESM2_ESM.pdf [file 12929_2018_433_MOESM2_ESM.pdf]

|              |       |       |     |     |         |    |        |       |      |         |   |         |   |     |   |   |   |   |   |   |   |   |   |    |   |   |   |   |   |   |   |   |   |   |   |   |   |   |   |   |   |   |   |   |   |   |   |      |   |   |   |
|--------------|-------|-------|-----|-----|---------|----|--------|-------|------|---------|---|---------|---|-----|---|---|---|---|---|---|---|---|---|----|---|---|---|---|---|---|---|---|---|---|---|---|---|---|---|---|---|---|---|---|---|---|---|------|---|---|---|
|              |       | 1     |     | 50  |         |    |        |       |      |         |   |         |   |     |   |   |   |   |   |   |   |   |   |    |   |   |   |   |   |   |   |   |   |   |   |   |   |   |   |   |   |   |   |   |   |   |   |      |   |   |   |
| Consensus H3 | (1)   | MKTTI | ALS | YII | CLVFAQK | LP | XGND   | NSTAT | L    | CLGHHAV | P | NGT     | L | V   | K | T | I | T | I | N | D | Q |   |    |   |   |   |   |   |   |   |   |   |   |   |   |   |   |   |   |   |   |   |   |   |   |   |      |   |   |   |
| Consensus H7 | (1)   | ----  | MNT | Q   | II      | V  | FALCAI | IP    | ---- | TNADK   | I | CLGHHAV | S | NGT | K | V | N | T | L | T | E | R | G |    |   |   |   |   |   |   |   |   |   |   |   |   |   |   |   |   |   |   |   |   |   |   |   |      |   |   |   |
|              |       | 51    |     | 100 |         |    |        |       |      |         |   |         |   |     |   |   |   |   |   |   |   |   |   |    |   |   |   |   |   |   |   |   |   |   |   |   |   |   |   |   |   |   |   |   |   |   |   |      |   |   |   |
| Consensus H3 | (51)  | I     | E   | V   | T       | N  | A      | T     | E    | L       | V | Q       | S | S   | T | G | R | I | C | D | S | P | H | Q  | I | L | D | G | E | N | C | T | L | I | D | A | L | L | G | D | P | H | C | D | G | F | Q | N    | K | E |   |
| Consensus H7 | (42)  | V     | E   | V   | N       | A  | T      | E     | T    | V       | E | R       | T | N   | I | P | R | I | C | S | K | G | K | R  | T | V | D | L | G | Q | C | G | L | L | G | T | I | T | G | P | P | Q | C | D | Q | F | L | E    | F | S |   |
|              |       | 101   |     | 150 |         |    |        |       |      |         |   |         |   |     |   |   |   |   |   |   |   |   |   |    |   |   |   |   |   |   |   |   |   |   |   |   |   |   |   |   |   |   |   |   |   |   |   |      |   |   |   |
| Consensus H3 | (101) | W     | D   | I   | F       | V  | E      | R     | S    | K       | A | Y       | S | N   | C | Y | P | Y | D | V | P | D | Y | A  | S | L | R | S | L | V | A | S | S | G | T | L | E | F | N | N | E | S | F | N | W | T | G | V    | A | Q | N |
| Consensus H7 | (92)  | A     | D   | I   | I       | E  | R      | R     | E    | G       | S | D       | V | C   | Y | P | G | K | F | V | N | E | E | A  | L | R | Q | I | L | R | E | S | G | G | I | D | K | E | S | M | G | F | T | Y | S | G | I | R    | T | N |   |
|              |       | 151   |     | 200 |         |    |        |       |      |         |   |         |   |     |   |   |   |   |   |   |   |   |   |    |   |   |   |   |   |   |   |   |   |   |   |   |   |   |   |   |   |   |   |   |   |   |   |      |   |   |   |
| Consensus H3 | (151) | G     | T   | S   | S       | A  | C      | K     | R    | R       | S | V       | K | S   | F | F | S | R | N | W | L | H | X | -- | L | K | Y | K | P | A | L | N | V | T | M | P | N | N | E | K | F | D | K | L | I | I | W | G    |   |   |   |
| Consensus H7 | (142) | G     | A   | T   | S       | A  | C      | R     | R    | -       | S | G       | S | S   | F | Y | A | E | M | K | W | L | S | N  | T | D | N | A | A | F | P | Q | M | T | K | S | Y | K | N | T | R | K | K | P | A | L | I | I    | W | G |   |
|              |       | 201   |     | 250 |         |    |        |       |      |         |   |         |   |     |   |   |   |   |   |   |   |   |   |    |   |   |   |   |   |   |   |   |   |   |   |   |   |   |   |   |   |   |   |   |   |   |   |      |   |   |   |
| Consensus H3 | (199) | V     | H   | H   | P       | S  | I      | D     | S    | Q       | I | S       | L | Y   | A | Q | A | S | G | R | V | T | V | S  | T | K | R | S | Q | Q | T | V | I | P | N | I | G | S | R | P | W | V | R | G | V | S | S | R    | I | S |   |
| Consensus H7 | (191) | I     | H   | H   | S       | G  | S      | T     | T    | E       | Q | T       | K | L   | Y | G | S | E | N | K | L | I | T | V  | G | S | S | N | Y | Q | Q | S | F | V | P | S | P | G | A | R | P | Q | V | N | G | Q | S | G    | R | I | D |
|              |       | 251   |     | 300 |         |    |        |       |      |         |   |         |   |     |   |   |   |   |   |   |   |   |   |    |   |   |   |   |   |   |   |   |   |   |   |   |   |   |   |   |   |   |   |   |   |   |   |      |   |   |   |
| Consensus H3 | (249) | I     | Y   | W   | T       | I  | V      | K     | F    | G       | D | I       | L | I   | N | S | T | G | N | L | I | A | P | R  | G | Y | F | K | I | R | S | G | K | S | S | I | M | R | S | D | A | P | I | G | K | C | N | S    | E | C |   |
| Consensus H7 | (241) | F     | H   | W   | L       | M  | L      | N     | P    | N       | D | T       | V | T   | F | S | F | N | G | A | F | I | A | P  | D | R | A | S | F | L | R | G | K | S | M | G | I | Q | S | G | V | Q | V | D | A | N | C | E    | G | C |   |
|              |       | 301   |     | 350 |         |    |        |       |      |         |   |         |   |     |   |   |   |   |   |   |   |   |   |    |   |   |   |   |   |   |   |   |   |   |   |   |   |   |   |   |   |   |   |   |   |   |   |      |   |   |   |
| Consensus H3 | (299) | I     | T   | P   | N       | G  | S      | T     | P    | N       | D | K       | P | F   | Q | N | V | N | R | I | T | Y | G | A  | C | P | R | Y | V | K | Q | N | T | L | K | L | A | T | G | M | R | N | V | P | E | K | Q | ---- |   |   |   |
| Consensus H7 | (291) | Y     | H   | S   | G       | G  | T      | I     | S    | N       | L | P       | F | Q   | N | I | N | S | R | A | V | G | K | C  | P | R | Y | V | K | Q | E | S | L | L | L | A | T | G | M | K | N | V | P | E | I | P | K | G    | S | R |   |
|              |       | 351↓  |     | 400 |         |    |        |       |      |         |   |         |   |     |   |   |   |   |   |   |   |   |   |    |   |   |   |   |   |   |   |   |   |   |   |   |   |   |   |   |   |   |   |   |   |   |   |      |   |   |   |
| Consensus H3 | (345) | -     | T   | R   | G       | I  | F      | G     | A    | I       | A | G       | F | I   | E | N | G | W | E | G | M | V | D | G  | W | Y | G | F | R | H | Q | N | S | E | G | T | Q | A | A | D | L | K | S | T | Q | A | A | I    | X | Q |   |
| Consensus H7 | (341) | V     | G   | R   | G       | L  | F      | G     | A    | I       | A | G       | F | I   | E | N | G | W | E | G | L | I | D | G  | W | Y | G | F | R | H | Q | N | A | Q | G | E | T | A | A | D | Y | K | S | T | Q | S | A | I    | D | Q |   |
|              |       | 401   |     | 450 |         |    |        |       |      |         |   |         |   |     |   |   |   |   |   |   |   |   |   |    |   |   |   |   |   |   |   |   |   |   |   |   |   |   |   |   |   |   |   |   |   |   |   |      |   |   |   |
| Consensus H3 | (394) | I     | N   | G   | K       | L  | N      | R     | L    | I       | E | K       | T | N   | E | K | F | H | Q | I | E | K | E | F  | S | E | V | E | G | R | I | Q | D | L | E | K | Y | V | E | D | T | K | I | D | L | W | S | Y    | N | A | E |
| Consensus H7 | (391) | I     | T   | G   | K       | L  | N      | R     | L    | I       | E | K       | T | N   | Q | Q | F | E | L | I | D | N | E | F  | N | E | V | E | K | Q | I | G | N | V | I | N | W | T | R | D | S | M | T | E | V | W | S | Y    | N | A | E |
|              |       | 451   |     | 500 |         |    |        |       |      |         |   |         |   |     |   |   |   |   |   |   |   |   |   |    |   |   |   |   |   |   |   |   |   |   |   |   |   |   |   |   |   |   |   |   |   |   |   |      |   |   |   |
| Consensus H3 | (444) | L     | L   | V   | A       | E  | N      | Q     | H    | T       | I | D       | I | T   | D | S | E | M | N | K | L | F | E | R  | T | R | K | Q | L | R | E | N | A | E | D | M | G | N | G | C | F | K | I | Y | H | K | C | D    | N | A |   |
| Consensus H7 | (441) | L     | L   | V   | A       | E  | N      | Q     | H    | T       | I | D       | I | A   | D | S | E | M | N | K | L | Y | E | R  | V | K | R | Q | L | R | E | N | A | E | D | G | T | G | C | F | E | I | F | H | K | C | D | D    |   |   |   |
|              |       | 501   |     | 550 |         |    |        |       |      |         |   |         |   |     |   |   |   |   |   |   |   |   |   |    |   |   |   |   |   |   |   |   |   |   |   |   |   |   |   |   |   |   |   |   |   |   |   |      |   |   |   |
| Consensus H3 | (494) | C     | I   | G   | S       | I  | R      | N     | G    | T       | Y | D       | H | D   | V | Y | R | D | E | A | L | N | N | R  | F | Q | I | K | G | V | E | L | K | S | G | Y | K | D | W | I | L | W | I | S | F | A | I | S    | C | F | L |
| Consensus H7 | (491) | C     | M   | A   | S       | I  | R      | N     | N    | T       | Y | D       | H | S   | K | Y | R | E | E | A | M | Q | N | R  | I | Q | I | D | P | V | K | L | S | G | Y | K | D | V | I | L | W | F | S | F | G | A | S | C    | F | I |   |
|              |       | 551   |     | 574 |         |    |        |       |      |         |   |         |   |     |   |   |   |   |   |   |   |   |   |    |   |   |   |   |   |   |   |   |   |   |   |   |   |   |   |   |   |   |   |   |   |   |   |      |   |   |   |
| Consensus H3 | (544) | L     | C   | V   | L       | L  | G      | F     | I    | M       | W | A       | C | Q   | K | G | N | I | R | C | N | I | C | I  |   |   |   |   |   |   |   |   |   |   |   |   |   |   |   |   |   |   |   |   |   |   |   |      |   |   |   |
| Consensus H7 | (541) | L     | L   | A   | I       | A  | M      | G     | L    | V       | F | I       | C | V   | K | N | G | M | R | C | T | I | C | I  |   |   |   |   |   |   |   |   |   |   |   |   |   |   |   |   |   |   |   |   |   |   |   |      |   |   |   |

**Figure A**
