# Supplementary material for: Flagellin-fused protein targeting M2e and HA2 induces potent humoral and T-cell responses and protects mice against various influenza viruses a subtypes
Source: PubMed Central journal article supplement (PMC5891888; doi:10.1186/s12929-018-0433-5), 2018-04-09
Supplement: 12929_2018_433_MOESM3_ESM.pdf [file 12929_2018_433_MOESM3_ESM.pdf]

**Table 1**

| <b>Epitope ID</b> | <b>Epitope</b>                       | <b>References</b>                                  |
|-------------------|--------------------------------------|----------------------------------------------------|
| 13575             | ENQHTIDLTDSEMKNLFEKTRKQLRENAEDMGNGCF | Gelder CM et al. 1995, J Virol                     |
| 22098             | GRIQDLEKYVEDTKIDLWS                  | Gelder CM et al. 1995, J Virol                     |
| 30386             | KEFSEVEGRIQDLEKYV                    | Simeckova-Rosenberg J et al. 1995, Vaccine         |
|                   |                                      | Atassi MZ et al. 1984, Immunol Commun              |
| 31200             | KIDLWSYNAELLVALE                     | Gelder CM et al. 1998, Int Immunol                 |
| 31201             | KIDLWSYNAELLVALENQHTI                | Gelder CM et al. 1995, J Virol                     |
| 36498             | LIEKTNEKFHQIEKEFSEVEGRIQDLEKYVEDTKI  | Gelder CM et al. 1995, J Virol                     |
| 50488             | QDLEKYVEDTKIDLWS                     | Gelder CM et al. 1995, J Virol                     |
| 50489             | QDLEKYVEDTKIDLWSYNAELLVALENQHTIDLTDS | Gelder CM et al. 1995, J Virol                     |
| 62654             | SYNAELLVALENQHTI                     | Gelder CM et al. 1995, J Virol                     |
| 97636             | SEVEGRIQDLEKYVEDTK                   | Laurel Yong-Hwa Lee et al. 2008, J Clin Invest     |
| 129078            | KIDLWSYNAELLVALEN                    | Jenny Aurielle B Babon et al. 2009, Hum Immunol    |
| 129760            | RIQDLEKYVEDTKIDLW                    | Jenny Aurielle B Babon et al. 2009, Hum Immunol    |
| 130384            | YNAELLVALENQHTIDL                    | Jenny Aurielle B Babon et al. 2009, Hum Immunol    |
| 422849            | WSYNAELLVAMENQHTI                    | Katherine A Richards et al. 2015, J Infect Dis     |
|                   |                                      | Anthony DiPiazza et al. 2017, Clin Vaccine Immunol |
