# Supplementary material for: Flagellin-fused protein targeting M2e and HA2 induces potent humoral and T-cell responses and protects mice against various influenza viruses a subtypes
Source: PubMed Central journal article supplement (PMC5891888; doi:10.1186/s12929-018-0433-5), 2018-04-09
Supplement: 12929_2018_433_MOESM4_ESM.pdf [file 12929_2018_433_MOESM4_ESM.pdf]

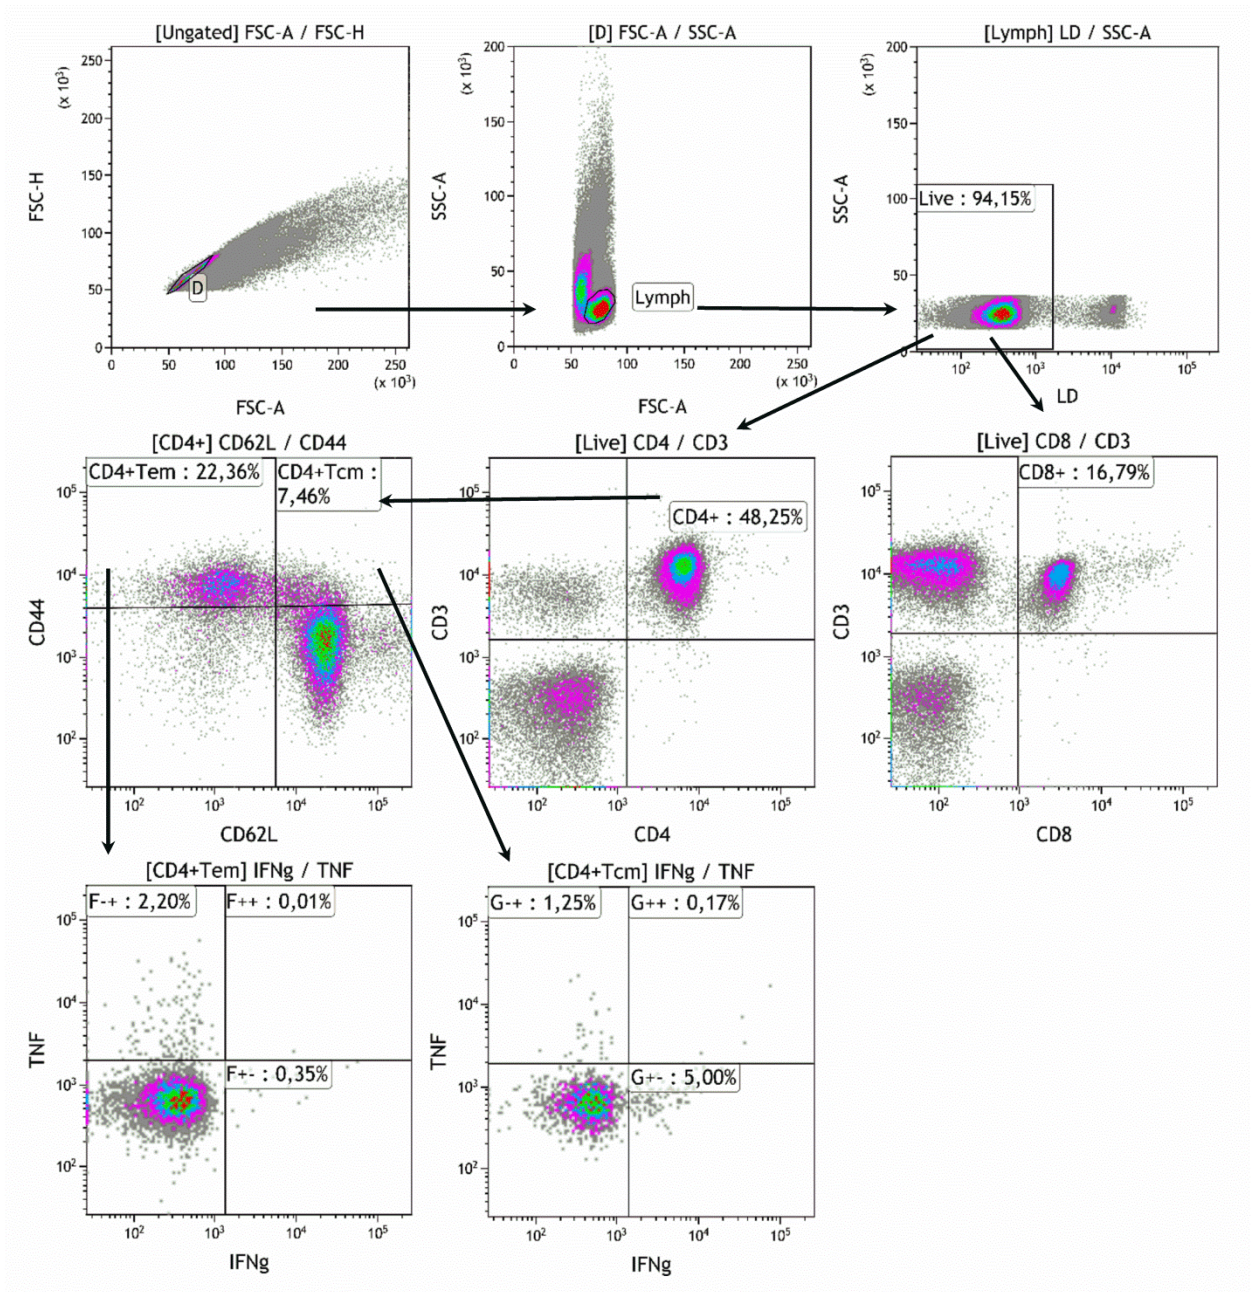

Figure A

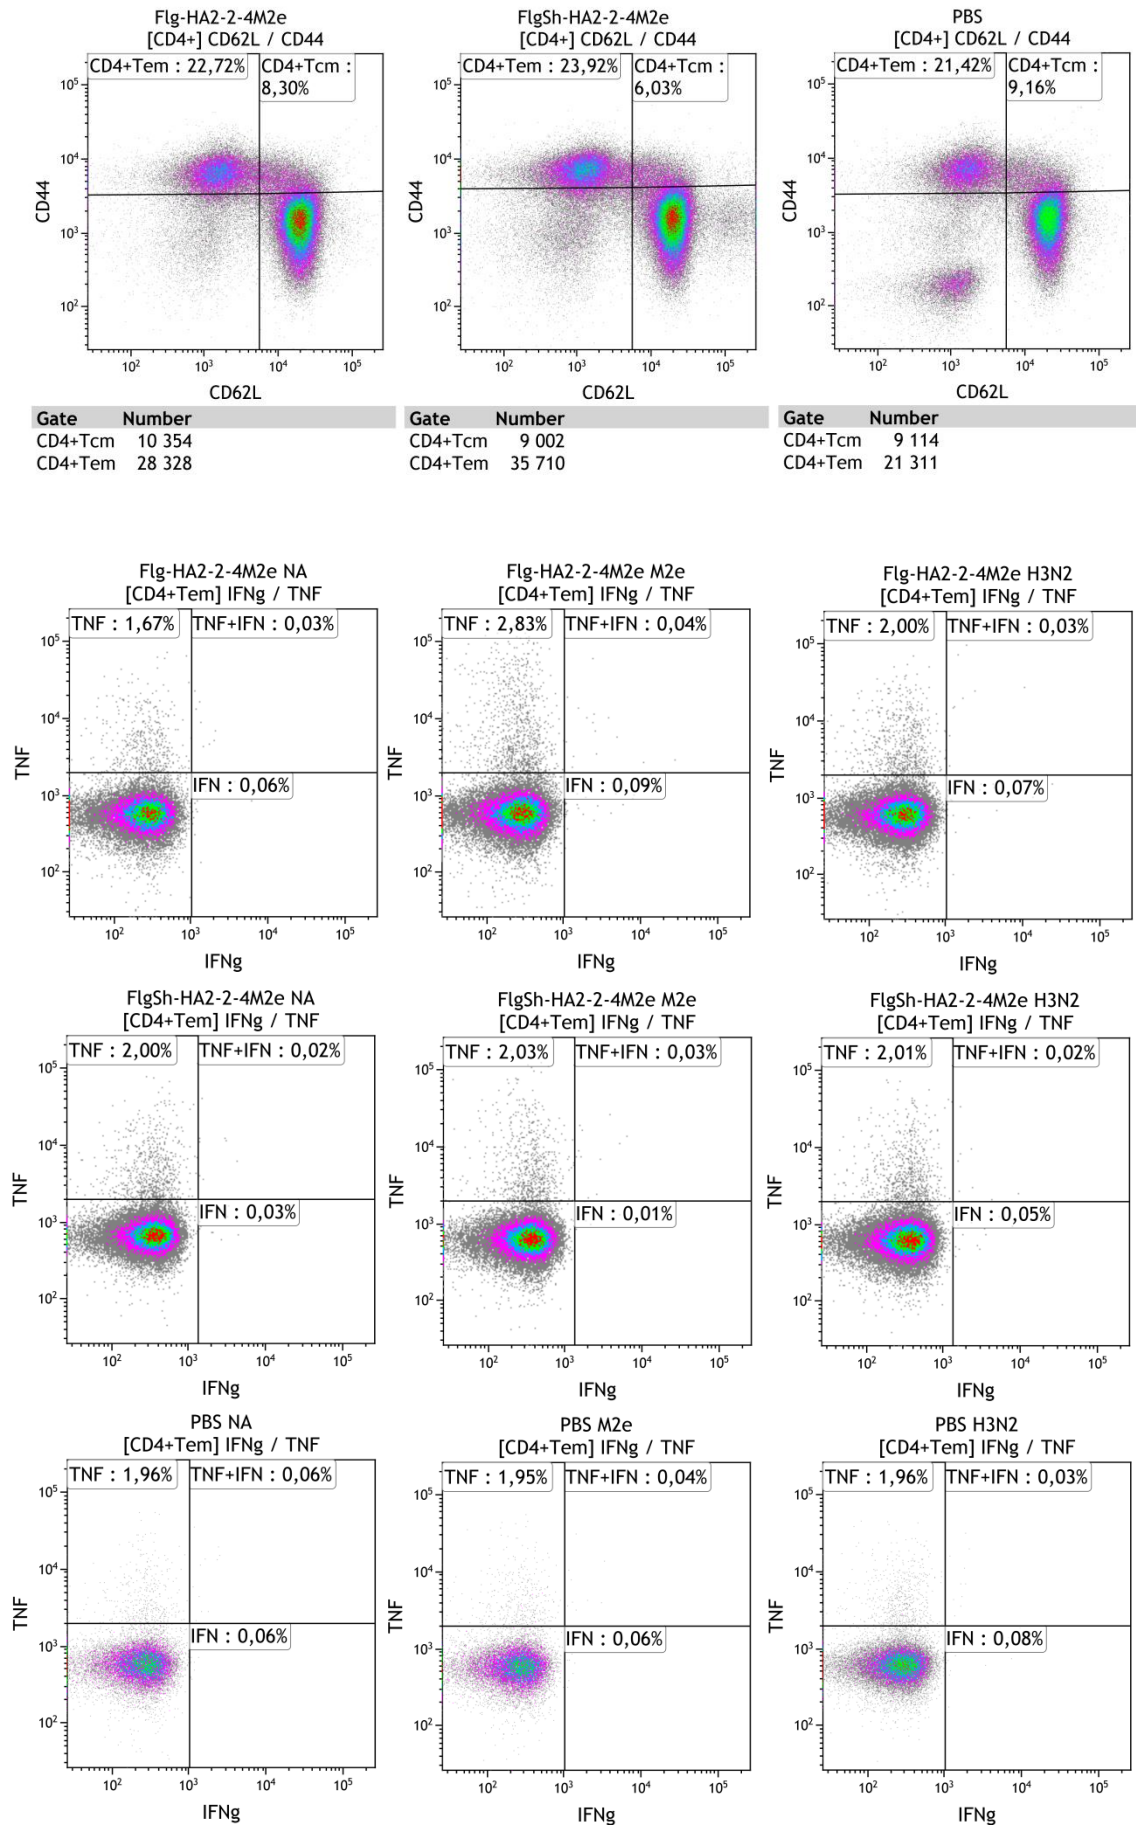

**Figure B**

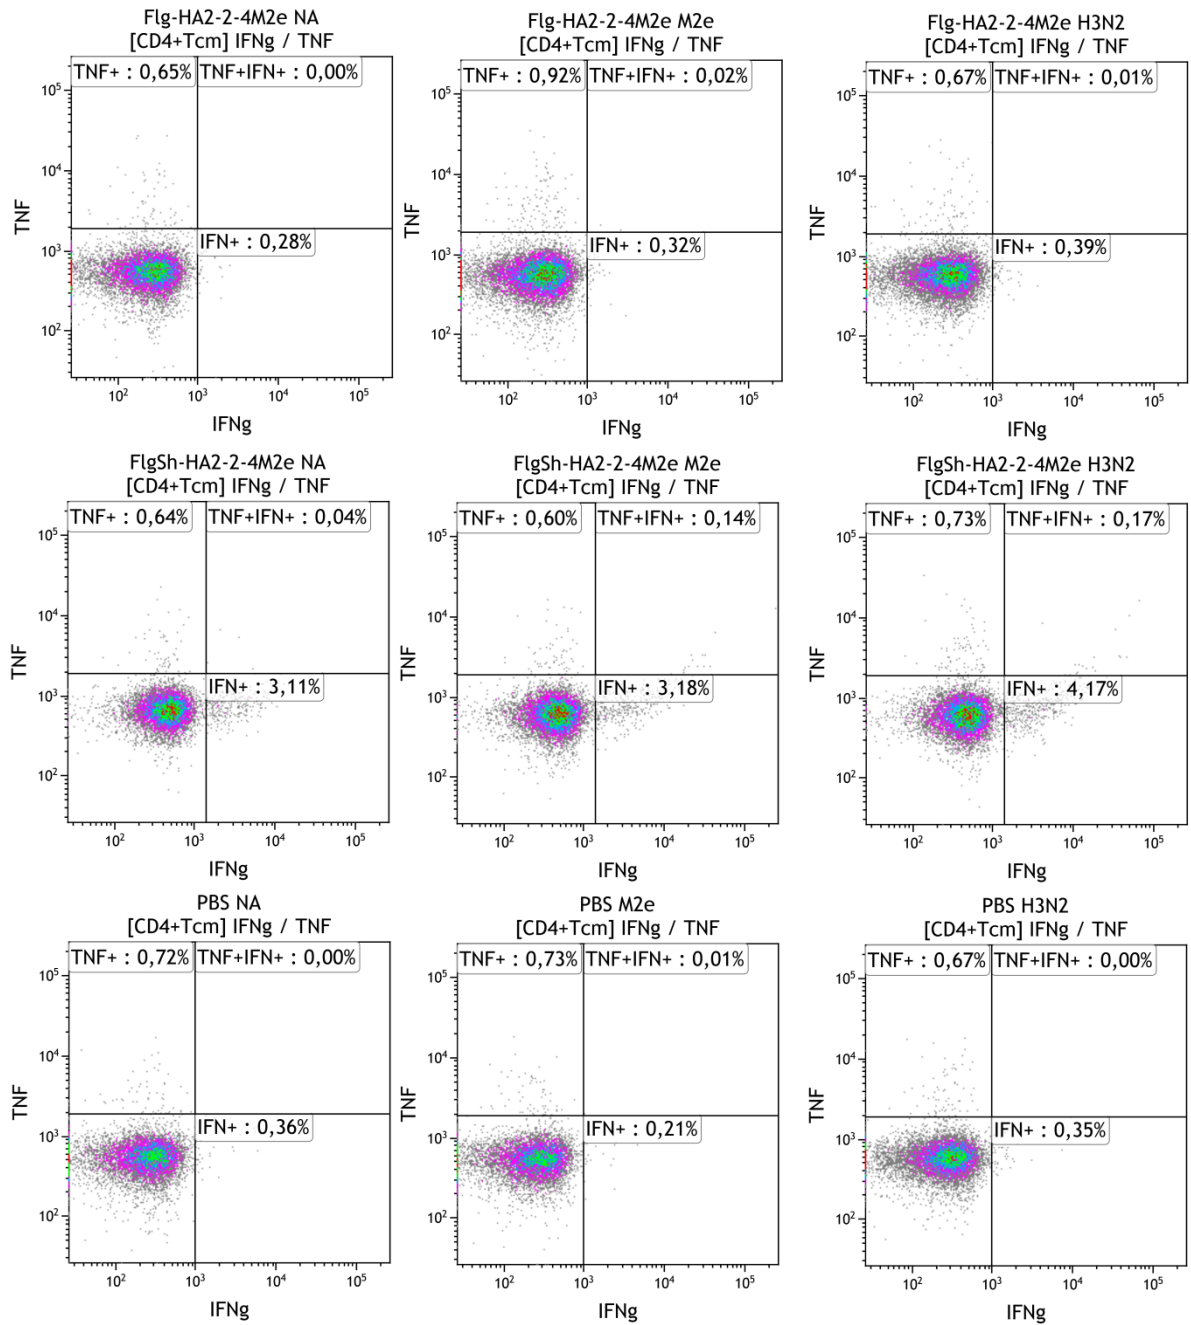

Figure C

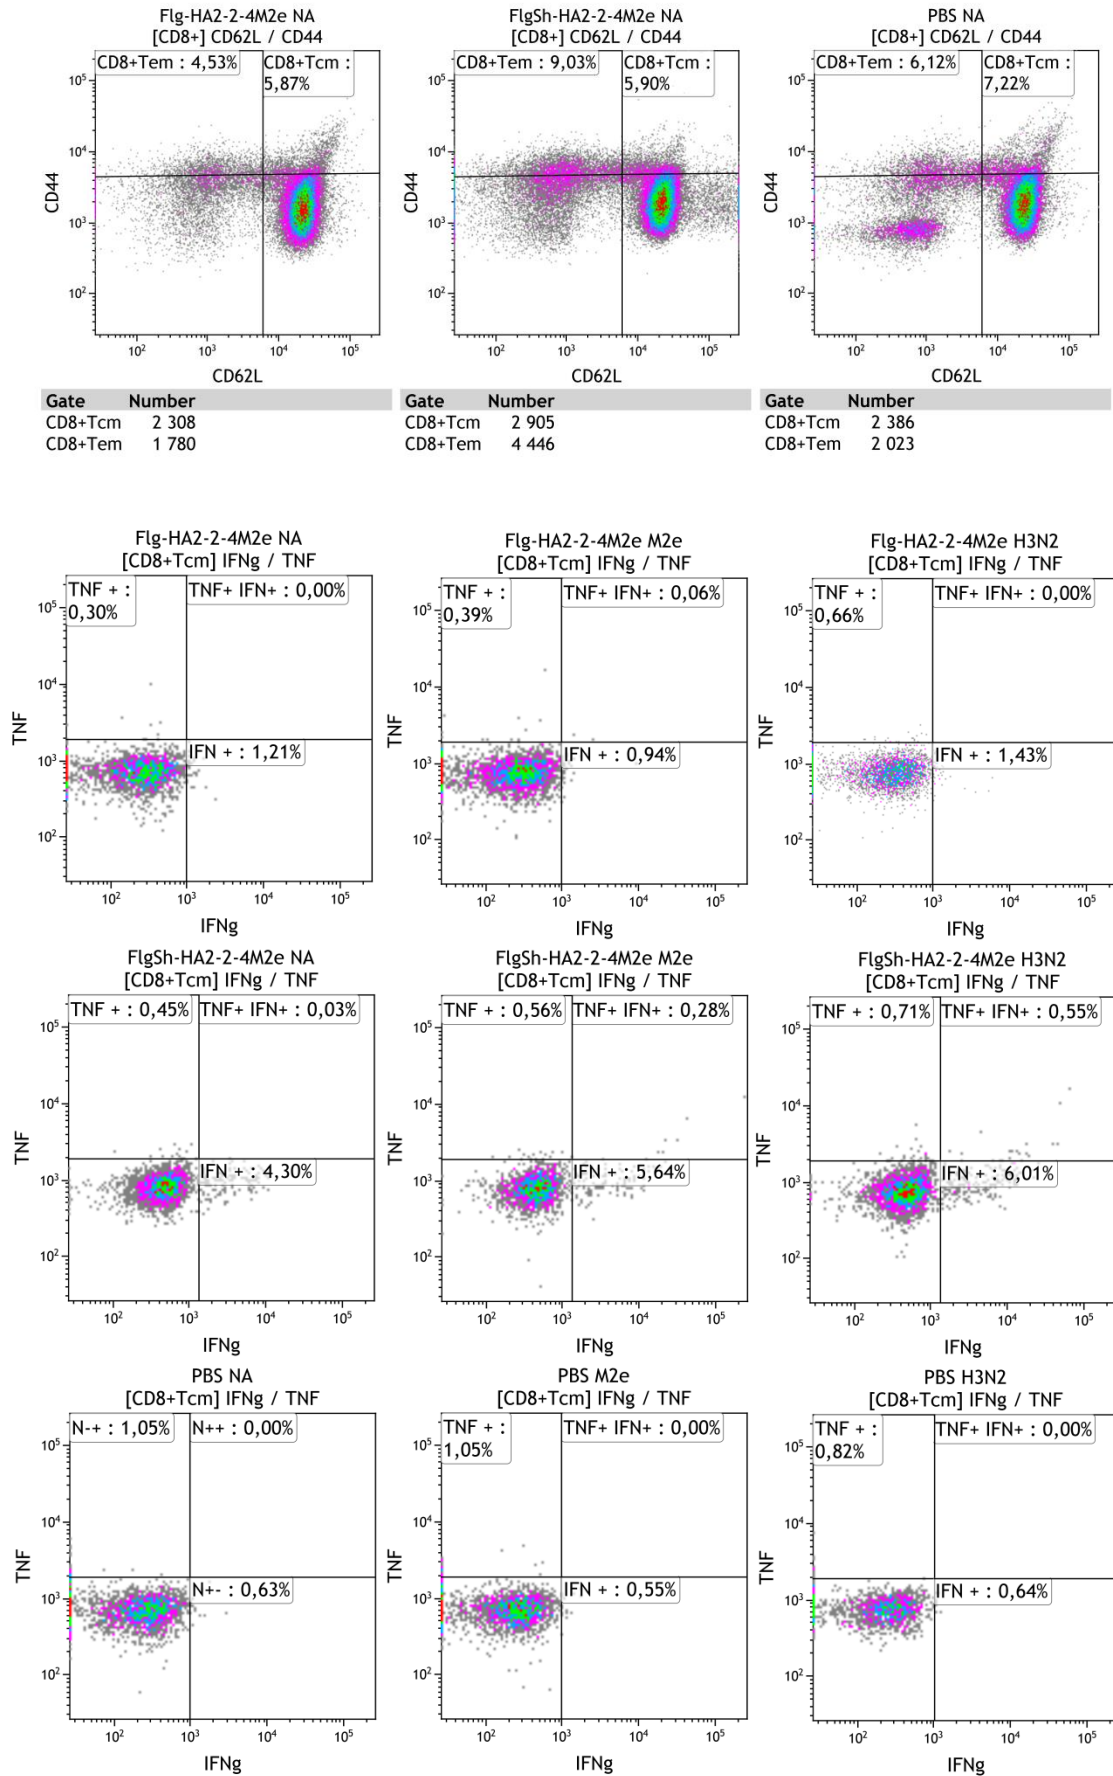

Figure D
